# Supplementary material for: A complete pedigree-based graph workflow for rare candidate variant analysis
Source: HighWire-hosted journal article supplement (doi:10.1101/gr.276387.121), 2022-04-28
Supplement: Supplemental_Data_.zip [file sibling_cv.xlsx]

## Sheet: Sheet1
dbID	type	muttype
chr3_156676203_A_G	UPSTREAM	SNP
chr6_55536669_C_A	OTHER	SNP
chr9_41680191_A_G	OTHER	SNP
chr1_178300073_G_A	DOWNSTREAM;NON_SYNONYMOUS_CODING	SNP
chr1_178472971_T_C	OTHER	SNP
chr10_73763020_G_A	UPSTREAM	SNP
chr10_73772991_G_A	DOWNSTREAM;NON_SYNONYMOUS_CODING;UPSTREAM	SNP
chr10_116972333_T_C	OTHER	SNP
chr10_117102621_G_C	OTHER	SNP
chr11_19722148_T_C	OTHER	SNP
chr11_20103261_C_T	NON_SYNONYMOUS_CODING;UPSTREAM	SNP
chr11_121137424_T_C	NON_SYNONYMOUS_CODING;UPSTREAM	SNP
chr11_121162269_G_A	NON_SYNONYMOUS_CODING	SNP
chr15_82950804_A_AT	OTHER	INDEL
chr15_82989113_G_A	DOWNSTREAM;NON_SYNONYMOUS_CODING;SYNONYMOUS_CODING;UPSTREAM	SNP
chr6_16754479_A_G	UPSTREAM	SNP
chr6_16759345_G_A	UPSTREAM	SNP
chr9_125546513_T_C	OTHER	SNP
chr9_125669890_G_T	NON_SYNONYMOUS_CODING;UPSTREAM;UTR_5_PRIME	SNP
dbID	type	muttype
chr1_125171122_A_T	OTHER	SNP
chr1_202144718_C_T	DOWNSTREAM;UTR_5_PRIME	SNP
chr12_18799295_G_A	OTHER	SNP
chr15_51667754_G_C	OTHER	SNP
chr5_89605508_C_T	OTHER	SNP
chr6_32666522_A_ACCGGG	FRAME_SHIFT;UPSTREAM	INDEL
chr9_82761119_A_G	OTHER	SNP
chr1_32209141_T_TG	DOWNSTREAM;FRAME_SHIFT;UPSTREAM	INDEL
chr1_32209326_T_C	DOWNSTREAM;NON_SYNONYMOUS_CODING;UPSTREAM	SNP
chr11_129123540_A_G	OTHER	SNP
chr11_129285086_T_G	OTHER	SNP
chr12_27667231_G_C	NON_SYNONYMOUS_CODING	SNP
chr12_27687487_C_T	DOWNSTREAM;NON_SYNONYMOUS_CODING;UPSTREAM	SNP
chr16_25836524_T_C	OTHER	SNP
chr16_25838877_T_C	OTHER	SNP
chr16_49636012_G_A	NON_SYNONYMOUS_CODING	SNP
chr16_49702353_C_T	OTHER	SNP
chr16_80365587_A_G	OTHER	SNP
chr16_80481241_A_G	OTHER	SNP
chr18_36432059_T_C	OTHER	SNP
chr18_36625569_G_A	NON_SYNONYMOUS_CODING	SNP
chr2_227051131_C_T	NON_SYNONYMOUS_CODING	SNP
chr2_227147588_T_C	SPLICE_SITE_REGION	SNP
chr3_114350760_C_T	DOWNSTREAM;NON_SYNONYMOUS_CODING;UPSTREAM	SNP
chr3_114745621_A_G	UPSTREAM	SNP
chr4_128957110_C_G	NON_SYNONYMOUS_CODING	SNP
chr4_128965269_C_A	NON_SYNONYMOUS_CODING	SNP
chr6_32387186_A_G	UPSTREAM	SNP
chr6_32396116_G_A	DOWNSTREAM;NON_SYNONYMOUS_CODING;UTR_3_PRIME	SNP
chr7_8262058_C_T	UPSTREAM;UTR_5_PRIME	SNP
chr7_8338236_C_T	OTHER	SNP
chr8_132869751_G_A	NON_SYNONYMOUS_CODING;UTR_3_PRIME	SNP
chr8_132967874_C_T	NON_SYNONYMOUS_CODING;UPSTREAM;UTR_3_PRIME	SNP
dbID	type	muttype
chr10_111578117_A_G	OTHER	SNP
chr12_64946426_C_T	OTHER	SNP
chr13_54183383_C_A	OTHER	SNP
chr16_59615544_A_G	OTHER	SNP
chr17_62579337_G_A	DOWNSTREAM	SNP
chr3_18444027_G_A	UPSTREAM	SNP
chr5_31076575_C_T	OTHER	SNP
chrX_12532278_T_C	OTHER	SNP
chrX_33339112_C_T	OTHER	SNP
chrX_38845017_C_T	OTHER	SNP
chrX_40078656_T_C	UPSTREAM	SNP
chrX_42775563_A_G	DOWNSTREAM	SNP
chrX_43914216_A_G	OTHER	SNP
chrX_78754865_A_T	DOWNSTREAM;START_GAINED;UTR_5_PRIME	SNP
chrX_101408451_C_T	UPSTREAM	SNP
chrX_147862926_T_G	OTHER	SNP
chrX_148162243_T_C	OTHER	SNP
chrX_154366818_G_A	NON_SYNONYMOUS_CODING;UPSTREAM	SNP
chrX_155061901_C_G	DOWNSTREAM;NON_SYNONYMOUS_CODING;UTR_3_PRIME	SNP
chr10_66828068_A_T	OTHER	SNP
chr10_67141720_T_G	OTHER	SNP
chr11_124863400_GC_G	UPSTREAM	INDEL
chr11_124876444_G_C	NON_SYNONYMOUS_CODING;UPSTREAM	SNP
chr11_132579899_T_C	OTHER	SNP
chr11_132943017_G_A	NON_SYNONYMOUS_CODING;SPLICE_SITE_REGION;UPSTREAM	SNP
chr14_92809369_G_A	NON_SYNONYMOUS_CODING;UPSTREAM	SNP
chr14_92811554_G_A	DOWNSTREAM;NON_SYNONYMOUS_CODING	SNP
chr17_16070460_T_G	NON_SYNONYMOUS_CODING;UPSTREAM	SNP
chr17_16215368_C_T	UPSTREAM;UTR_5_PRIME	SNP
chr20_46237305_C_T	OTHER	SNP
chr20_46241151_G_A	NON_SYNONYMOUS_CODING	SNP
chr7_13286973_T_G	OTHER	SNP
chr7_13414407_A_G	OTHER	SNP
dbID	type	muttype
chr16_32885297_G_T	UPSTREAM	SNP
chr9_86794465_C_G	OTHER	SNP
chrX_17481203_G_A	OTHER	SNP
chrX_39516713_C_T	OTHER	SNP
chrX_57910013_A_AGT	FRAME_SHIFT	INDEL
chrX_57910017_CAG_C	FRAME_SHIFT	INDEL
chrX_110794437_GCAA_G	OTHER	INDEL
chrX_115615079_G_A	DOWNSTREAM	SNP
chrX_127212594_T_G	OTHER	SNP
chrX_133604901_G_A	OTHER	SNP
chrX_133640630_C_T	OTHER	SNP
chrX_148814561_A_G	OTHER	SNP
chr10_113599149_C_T	OTHER	SNP
chr10_113614862_C_T	NON_SYNONYMOUS_CODING	SNP
chr12_45927093_C_A	DOWNSTREAM;NON_SYNONYMOUS_CODING;UPSTREAM	SNP
chr12_45951721_C_T	DOWNSTREAM;NON_SYNONYMOUS_CODING;UPSTREAM	SNP
chr16_51146480_A_G	UPSTREAM	SNP
chr16_51151500_C_T	DOWNSTREAM;UPSTREAM	SNP
chr16_53888835_G_A	NON_SYNONYMOUS_CODING;UPSTREAM;UTR_3_PRIME;UTR_5_PRIME	SNP
chr16_54064712_C_T	OTHER	SNP
chr2_26595201_C_A	NON_SYNONYMOUS_CODING	SNP
chr2_26614015_C_T	OTHER	SNP
chr3_84973525_C_T	OTHER	SNP
chr3_85723403_C_T	UPSTREAM	SNP
chr4_146294605_T_C	OTHER	SNP
chr4_146521827_T_G	START_GAINED;UPSTREAM;UTR_5_PRIME	SNP
chr6_156791571_G_T	OTHER	SNP
chr6_157143323_G_A	DOWNSTREAM	SNP
chr7_70701863_A_G	DOWNSTREAM	SNP
chr7_70790653_G_T	DOWNSTREAM;NON_SYNONYMOUS_CODING	SNP
chr7_149779030_G_T	SPLICE_SITE_REGION;UPSTREAM	SNP
chr7_149785167_C_T	DOWNSTREAM;UPSTREAM	SNP
chr7_149785167_C_T	DOWNSTREAM;UPSTREAM	SNP
chr7_149831174_G_A	DOWNSTREAM	SNP
dbID	type	muttype
chr11_33954809_G_T	OTHER	SNP
chr17_42841603_CTG_C	DOWNSTREAM;UPSTREAM;UTR_3_PRIME	INDEL
chr2_148768160_G_A	OTHER	SNP
chr5_15720333_T_C	OTHER	SNP
chr7_62405870_T_C	OTHER	SNP
chr12_24249533_A_G	OTHER	SNP
chr12_24490628_T_C	OTHER	SNP
chr12_123203372_T_C	NON_SYNONYMOUS_CODING;UPSTREAM;UTR_3_PRIME	SNP
chr12_123221766_T_G	DOWNSTREAM;NON_SYNONYMOUS_CODING;UPSTREAM;UTR_3_PRIME	SNP
chr16_3112615_C_T	DOWNSTREAM;START_GAINED;UPSTREAM;UTR_5_PRIME	SNP
chr16_3120209_T_A	DOWNSTREAM;NON_SYNONYMOUS_CODING	SNP
chr17_46728875_C_T	STOP_GAINED	SNP
chr17_46746601_T_A	OTHER	SNP
chr6_118223787_C_G	OTHER	SNP
chr6_118314152_C_A	NON_SYNONYMOUS_CODING	SNP
chr9_109774174_C_T	UPSTREAM	SNP
chr9_110138202_GC_G	DOWNSTREAM;FRAME_SHIFT	INDEL
chr9_109867452_C_G	OTHER	SNP
chr9_110138202_GC_G	DOWNSTREAM;FRAME_SHIFT	INDEL
dbID	type	muttype
chr1_200275871_A_G	OTHER	SNP
chr1_218709819_A_T	OTHER	SNP
chr13_92671136_A_T	OTHER	SNP
chr16_13499619_T_C	OTHER	SNP
chr16_52812154_A_G	OTHER	SNP
chr17_67656445_T_C	DOWNSTREAM	SNP
chr2_124685451_G_GA	UPSTREAM	INDEL
chr2_124685452_T_A	UPSTREAM	SNP
chr2_124685453_T_A	UPSTREAM	SNP
chr2_124685455_TGC_T	UPSTREAM	INDEL
chr3_111939532_C_T	NON_SYNONYMOUS_CODING	SNP
chr6_102055330_G_A	NON_SYNONYMOUS_CODING	SNP
chrX_38968878_T_G	OTHER	SNP
chrX_39233116_G_T	OTHER	SNP
chrX_45810261_T_C	OTHER	SNP
chrX_130118642_C_G	OTHER	SNP
chrX_153249594_G_A	OTHER	SNP
chrX_154374650_G_C	UPSTREAM	SNP
chr16_24791580_AAAG_A	CODON_DELETION;UPSTREAM;UTR_3_PRIME	INDEL
chr16_24818617_C_T	DOWNSTREAM;NON_SYNONYMOUS_CODING;UPSTREAM;UTR_3_PRIME	SNP
chr3_76933629_T_G	OTHER	SNP
chr3_77565064_T_C	DOWNSTREAM;NON_SYNONYMOUS_CODING;UTR_3_PRIME	SNP
chr7_103557156_G_A	NON_SYNONYMOUS_CODING	SNP
chr7_103565380_G_C	NON_SYNONYMOUS_CODING	SNP
dbID	type	muttype
chr1_120876170_A_T	OTHER	SNP
chr2_124685451_G_GA	UPSTREAM	INDEL
chr2_124685452_T_A	UPSTREAM	SNP
chr2_124685453_T_A	UPSTREAM	SNP
chr2_124685455_TGC_T	UPSTREAM	INDEL
chrX_119807238_A_G	OTHER	SNP
chr18_3879164_G_A	NON_SYNONYMOUS_CODING;UPSTREAM	SNP
chr18_3910668_T_C	OTHER	SNP
chr6_8611519_A_C	DOWNSTREAM	SNP
chr6_8654431_G_A	DOWNSTREAM	SNP
chr7_13920318_G_A	OTHER	SNP
chr7_13977543_T_C	OTHER	SNP
chr8_10591480_T_C	OTHER	SNP
chr8_10622747_C_T	NON_SYNONYMOUS_CODING	SNP
chr8_109579922_A_G	DOWNSTREAM;NON_SYNONYMOUS_CODING;UTR_3_PRIME;UTR_5_PRIME	SNP
chr8_109639006_T_C	DOWNSTREAM	SNP
dbID	type	muttype
chr1_177043689_C_T	OTHER	SNP
chr15_36407409_C_CTGTTGT	OTHER	INDEL
chr15_36407412_A_T	OTHER	SNP
chr15_36407413_A_T	OTHER	SNP
chr15_45746795_T_C	OTHER	SNP
chr15_59202419_G_C	UPSTREAM	SNP
chr5_147554457_G_A	OTHER	SNP
chr5_160405584_A_G	DOWNSTREAM;UPSTREAM	SNP
chr7_60919828_T_C	OTHER	SNP
chr9_116789747_A_G	OTHER	SNP
chr14_102932472_A_T	DOWNSTREAM;UPSTREAM;UTR_3_PRIME	SNP
chr14_102950513_C_T	NON_SYNONYMOUS_CODING;UPSTREAM	SNP
chr18_50036869_C_T	DOWNSTREAM;NON_SYNONYMOUS_CODING	SNP
chr18_50099228_A_G	DOWNSTREAM;UPSTREAM	SNP
chr3_180813550_G_A	OTHER	SNP
chr3_180834121_T_G	UPSTREAM	SNP
chr7_30448383_T_G	UPSTREAM	SNP
chr7_30452221_C_T	DOWNSTREAM;NON_SYNONYMOUS_CODING;UPSTREAM	SNP
dbID	type	muttype
chr11_35065671_T_C	OTHER	SNP
chr12_56596788_A_G	DOWNSTREAM;UTR_3_PRIME	SNP
chr2_110757685_A_G	OTHER	SNP
chr5_33009053_T_C	DOWNSTREAM	SNP
chr7_61055293_T_C	OTHER	SNP
chr1_44524858_C_T	OTHER	SNP
chr1_44619422_T_C	OTHER	SNP
chr11_4882443_T_TACCACCCC	DOWNSTREAM;FRAME_SHIFT	INDEL
chr11_4923436_G_A	NON_SYNONYMOUS_CODING;UPSTREAM	SNP
chr19_12702913_C_G	DOWNSTREAM;NON_SYNONYMOUS_CODING;UPSTREAM	SNP
chr19_12721166_G_C	DOWNSTREAM;UPSTREAM;UTR_5_PRIME	SNP
chr2_50564888_A_G	OTHER	SNP
chr2_50760086_A_C	OTHER	SNP
chr3_29318002_T_C	OTHER	SNP
chr3_29760016_A_G	UPSTREAM	SNP
chr5_73233800_G_A	OTHER	SNP
chr5_73234096_G_A	OTHER	SNP
chr1_25318163_A_G	OTHER	SNP
chr1_25329789_A_G	DOWNSTREAM;UTR_3_PRIME	SNP
dbID	type	muttype
chr1_26022023_C_T	START_GAINED;UPSTREAM;UTR_5_PRIME	SNP
chr13_78306625_C_T	OTHER	SNP
chr16_65348184_CGAAGTA_C	OTHER	INDEL
chr4_90146330_A_G	OTHER	SNP
chr4_92356761_T_G	OTHER	SNP
chr8_77754338_C_T	OTHER	SNP
chr9_71767465_C_T	OTHER	SNP
chr1_43404541_G_T	NON_SYNONYMOUS_CODING	SNP
chr1_43441784_G_A	DOWNSTREAM;NON_SYNONYMOUS_CODING;UPSTREAM	SNP
chr1_43439080_G_A	DOWNSTREAM;NON_SYNONYMOUS_CODING;UPSTREAM	SNP
chr1_43441784_G_A	DOWNSTREAM;NON_SYNONYMOUS_CODING;UPSTREAM	SNP
chr1_185909425_G_T	NON_SYNONYMOUS_CODING	SNP
chr1_186137915_C_T	NON_SYNONYMOUS_CODING	SNP
chr1_186129729_ATGTT_A	OTHER	INDEL
chr1_186137915_C_T	NON_SYNONYMOUS_CODING	SNP
chr1_224967518_G_C	NON_SYNONYMOUS_CODING;SPLICE_SITE_REGION;UPSTREAM	SNP
chr1_225152049_C_T	NON_SYNONYMOUS_CODING	SNP
chr10_95311778_C_T	DOWNSTREAM;UTR_3_PRIME	SNP
chr10_95432480_G_A	NON_SYNONYMOUS_CODING	SNP
chr18_74796599_C_A	OTHER	SNP
chr18_74876959_T_C	UPSTREAM	SNP
chr22_27992588_C_T	DOWNSTREAM;NON_SYNONYMOUS_CODING;UPSTREAM	SNP
chr22_28679602_C_G	OTHER	SNP
chr3_124187590_G_C	OTHER	SNP
chr3_124666528_G_A	NON_SYNONYMOUS_CODING	SNP
chr5_61657841_T_G	DOWNSTREAM	SNP
chr5_61731170_A_G	DOWNSTREAM	SNP
chr7_70588260_G_T	OTHER	SNP
chr7_70630862_G_A	OTHER	SNP
dbID	type	muttype
chr12_105147049_T_C	DOWNSTREAM;NON_SYNONYMOUS_CODING;UPSTREAM;UTR_3_PRIME	SNP
chr20_56533454_G_A	NON_SYNONYMOUS_CODING	SNP
chr6_31342974_A_G	OTHER	SNP
chr8_128493402_T_C	OTHER	SNP
chr9_39102658_A_G	DOWNSTREAM;NON_SYNONYMOUS_CODING	SNP
chr1_1045244_G_A	DOWNSTREAM;NON_SYNONYMOUS_CODING;UPSTREAM	SNP
chr1_1050775_C_T	DOWNSTREAM;STOP_GAINED;UPSTREAM	SNP
chr1_50571507_T_G	OTHER	SNP
chr1_50669205_G_A	OTHER	SNP
chr1_183023499_G_T	UTR_5_PRIME	SNP
chr1_183133497_G_A	DOWNSTREAM;NON_SYNONYMOUS_CODING;UPSTREAM	SNP
chr10_75851834_A_G	OTHER	SNP
chr10_76161157_A_T	OTHER	SNP
chr10_75924459_C_CA	OTHER	INDEL
chr10_76161157_A_T	OTHER	SNP
chr14_102263573_C_T	NON_SYNONYMOUS_CODING;UTR_3_PRIME	SNP
chr14_102265890_G_A	STOP_GAINED;UPSTREAM;UTR_3_PRIME	SNP
chr2_200337331_T_G	OTHER	SNP
chr2_200440691_C_T	DOWNSTREAM;NON_SYNONYMOUS_CODING	SNP
chr20_62836490_A_G	DOWNSTREAM;NON_SYNONYMOUS_CODING;UPSTREAM	SNP
chr20_62840688_G_A	DOWNSTREAM;NON_SYNONYMOUS_CODING;UPSTREAM	SNP
chr22_20080009_G_A	UPSTREAM	SNP
chr22_20116212_C_T	DOWNSTREAM;NON_SYNONYMOUS_CODING;UPSTREAM	SNP
chr22_20080264_C_A	UPSTREAM;UTR_5_PRIME	SNP
chr22_20116212_C_T	DOWNSTREAM;NON_SYNONYMOUS_CODING;UPSTREAM	SNP
chr3_9928340_C_T	DOWNSTREAM;STOP_GAINED;UPSTREAM;UTR_3_PRIME	SNP
chr3_9947857_C_G	DOWNSTREAM;NON_SYNONYMOUS_CODING	SNP
chr3_147932423_A_G	OTHER	SNP
chr3_147934937_T_C	UPSTREAM	SNP
chr5_168777756_C_T	OTHER	SNP
chr5_169001692_G_A	OTHER	SNP
chr6_31632179_G_A	DOWNSTREAM;NON_SYNONYMOUS_CODING;UPSTREAM	SNP
chr6_31635721_A_G	DOWNSTREAM;NON_SYNONYMOUS_CODING;UPSTREAM	SNP
chr6_163047488_A_C	DOWNSTREAM;UPSTREAM	SNP
chr6_163166478_A_G	DOWNSTREAM	SNP
chr9_13165336_CATA_C	OTHER	INDEL
chr9_13183485_G_C	NON_SYNONYMOUS_CODING	SNP
chr9_115035265_G_A	DOWNSTREAM;NON_SYNONYMOUS_CODING	SNP
chr9_115052764_G_T	NON_SYNONYMOUS_CODING	SNP
chr9_117141452_C_T	NON_SYNONYMOUS_CODING	SNP
chr9_117278716_C_T	DOWNSTREAM	SNP
dbID	type	muttype
chr1_11925628_G_A	STOP_GAINED	SNP
chr10_93246186_A_G	OTHER	SNP
chr14_23061599_C_G	DOWNSTREAM;NON_SYNONYMOUS_CODING;UPSTREAM;UTR_3_PRIME	SNP
chr15_89211781_G_A	NON_SYNONYMOUS_CODING;UTR_3_PRIME	SNP
chr2_205390459_C_A	OTHER	SNP
chr20_53207172_C_T	OTHER	SNP
chr5_160405583_A_G	DOWNSTREAM;UPSTREAM	SNP
chr5_160405584_A_G	DOWNSTREAM;UPSTREAM	SNP
chr8_130442835_G_A	OTHER	SNP
chrX_12173215_G_T	OTHER	SNP
chrX_16131055_CTAAT_C	OTHER	INDEL
chrX_24634974_A_G	DOWNSTREAM	SNP
chrX_28587187_T_C	UPSTREAM	SNP
chrX_28623141_T_C	OTHER	SNP
chrX_32598338_G_C	OTHER	SNP
chrX_39821538_G_T	OTHER	SNP
chrX_42500682_A_T	OTHER	SNP
chrX_46913214_C_T	OTHER	SNP
chrX_153940122_C_T	DOWNSTREAM;NON_SYNONYMOUS_CODING;UTR_3_PRIME	SNP
chr1_43649977_T_A	UPSTREAM	SNP
chr1_43704020_G_A	DOWNSTREAM;NON_SYNONYMOUS_CODING;SPLICE_SITE_REGION;UPSTREAM;UTR_3_PRIME	SNP
chr18_55520566_T_G	OTHER	SNP
chr18_55550567_T_C	UPSTREAM	SNP
chr19_30224199_T_C	UPSTREAM	SNP
chr19_30451054_C_T	OTHER	SNP
chr19_56524993_A_G	NON_SYNONYMOUS_CODING	SNP
chr19_56525356_C_G	NON_SYNONYMOUS_CODING;UTR_3_PRIME	SNP
chr2_178732873_C_T	NON_SYNONYMOUS_CODING;UPSTREAM	SNP
chr2_178768152_C_T	DOWNSTREAM;NON_SYNONYMOUS_CODING;UPSTREAM	SNP
chr3_158292534_A_G	OTHER	SNP
chr3_158385974_T_C	OTHER	SNP
chr7_8613460_T_C	OTHER	SNP
chr7_8699492_G_A	OTHER	SNP
dbID	type	muttype
chr1_1629537_C_T	DOWNSTREAM;NON_SYNONYMOUS_CODING;UPSTREAM;UTR_3_PRIME	SNP
chr1_33255518_G_A	UPSTREAM	SNP
chr11_86953608_ATTTCT_A	DOWNSTREAM;UPSTREAM	INDEL
chr11_86977677_A_G	OTHER	SNP
chr12_14729401_C_T	OTHER	SNP
chr1_213892516_G_A	DOWNSTREAM	SNP
chr1_213975069_T_C	OTHER	SNP
chr14_56590548_C_T	DOWNSTREAM	SNP
chr14_56650149_T_C	DOWNSTREAM;UPSTREAM;UTR_3_PRIME	SNP
chr17_17972114_C_T	UPSTREAM	SNP
chr17_17983872_A_G	DOWNSTREAM;NON_SYNONYMOUS_CODING;UPSTREAM	SNP
chr3_60980474_T_C	OTHER	SNP
chr3_61225545_A_G	OTHER	SNP
chr3_78670194_G_A	NON_SYNONYMOUS_CODING	SNP
chr3_78701748_GTGCAA_G	OTHER	INDEL
chr8_19939200_G_C	UPSTREAM	SNP
chr8_19956018_A_G	DOWNSTREAM;NON_SYNONYMOUS_CODING	SNP
chr9_125634464_T_G	OTHER	SNP
chr9_125646958_A_G	OTHER	SNP
dbID	type	muttype
chr1_125175201_G_A	OTHER	SNP
chr19_7766048_A_ACC	FRAME_SHIFT;UPSTREAM	INDEL
chr3_186214141_C_T	OTHER	SNP
chr4_108365426_A_ATAACC	OTHER	INDEL
chr4_108365427_G_T	OTHER	SNP
chr4_108365428_G_T	OTHER	SNP
chr6_32553054_G_A	UPSTREAM	SNP
chr7_65873237_CGCG_C	CODON_CHANGE_PLUS_CODON_DELETION;UPSTREAM;UTR_5_PRIME	INDEL
chr16_72894741_A_G	UPSTREAM	SNP
chr16_72957870_T_G	NON_SYNONYMOUS_CODING	SNP
chr19_2163934_T_C	START_GAINED;UPSTREAM;UTR_5_PRIME	SNP
chr19_2223365_G_C	DOWNSTREAM;NON_SYNONYMOUS_CODING;UPSTREAM	SNP
chr3_170481153_C_T	DOWNSTREAM;NON_SYNONYMOUS_CODING	SNP
chr3_170486307_G_A	NON_SYNONYMOUS_CODING	SNP
dbID	type	muttype
chr1_200559466_T_C	OTHER	SNP
chr11_103153387_C_G	NON_SYNONYMOUS_CODING;UTR_3_PRIME	SNP
chr11_112074420_C_T	UPSTREAM;UTR_5_PRIME	SNP
chr11_112075880_A_G	UPSTREAM	SNP
chr11_112214814_G_A	NON_SYNONYMOUS_CODING;UPSTREAM	SNP
chr11_112339334_G_A	OTHER	SNP
chr11_112586297_TTAAAA_T	OTHER	INDEL
chr12_55017315_G_A	DOWNSTREAM;UPSTREAM	SNP
chr20_14293499_T_C	OTHER	SNP
chr22_41925447_G_A	NON_SYNONYMOUS_CODING;UPSTREAM	SNP
chrX_31031105_G_T	OTHER	SNP
chrX_40807427_T_C	OTHER	SNP
chrX_43535600_A_T	OTHER	SNP
chrX_50861399_G_A	OTHER	SNP
chrX_71098549_G_C	UPSTREAM	SNP
chrX_96495048_A_G	OTHER	SNP
chrX_97420040_T_G	OTHER	SNP
chrX_97478308_T_C	OTHER	SNP
chrX_97681767_A_C	OTHER	SNP
chrX_97754305_T_C	OTHER	SNP
chrX_97834689_G_T	OTHER	SNP
chrX_99986630_A_G	OTHER	SNP
chrX_100019726_T_A	OTHER	SNP
chrX_100019727_A_T	OTHER	SNP
chrX_100174576_A_C	OTHER	SNP
chrX_132005722_C_G	OTHER	SNP
chrX_132213155_C_G	DOWNSTREAM;UPSTREAM	SNP
chrX_132626224_C_G	DOWNSTREAM;UTR_3_PRIME	SNP
chrX_139027005_T_C	OTHER	SNP
chr10_29465690_A_G	NON_SYNONYMOUS_CODING	SNP
chr10_29731694_T_C	OTHER	SNP
chr13_78129616_T_C	OTHER	SNP
chr13_78306915_C_T	OTHER	SNP
chr3_39972240_T_C	DOWNSTREAM	SNP
chr3_40151097_C_T	NON_SYNONYMOUS_CODING;START_GAINED;UTR_5_PRIME	SNP
chr3_71080287_A_G	OTHER	SNP
chr3_71110638_T_C	DOWNSTREAM	SNP
chr3_114427534_C_T	OTHER	SNP
chr3_114823352_G_A	OTHER	SNP
chr6_51862716_G_T	OTHER	SNP
chr6_51990174_A_G	OTHER	SNP
chr6_51869829_A_G	OTHER	SNP
chr6_51990174_A_G	OTHER	SNP
dbID	type	muttype
chr10_16511051_G_A	DOWNSTREAM;NON_SYNONYMOUS_CODING	SNP
chr10_42084702_G_A	OTHER	SNP
chr2_64749075_A_T	DOWNSTREAM	SNP
chr21_30249521_AG_A	OTHER	INDEL
chr4_99873771_T_C	DOWNSTREAM	SNP
chr4_108365426_A_ATAACC	OTHER	INDEL
chr4_108365427_G_T	OTHER	SNP
chr4_108365428_G_T	OTHER	SNP
chr6_90262858_A_G	OTHER	SNP
chr9_122905350_C_G	DOWNSTREAM;UPSTREAM;UTR_5_PRIME	SNP
chr14_30243285_G_T	OTHER	SNP
chr14_30265947_T_C	OTHER	SNP
chr14_30265947_T_C	OTHER	SNP
chr14_30273525_T_C	OTHER	SNP
chr16_673021_G_A	DOWNSTREAM;NON_SYNONYMOUS_CODING;UPSTREAM	SNP
chr16_681318_G_A	DOWNSTREAM;NON_SYNONYMOUS_CODING;UPSTREAM	SNP
chr16_7296231_C_G	OTHER	SNP
chr16_7538005_A_G	OTHER	SNP
chr16_7304408_G_A	OTHER	SNP
chr16_7538005_A_G	OTHER	SNP
chr18_35042675_A_G	OTHER	SNP
chr18_35095053_A_G	OTHER	SNP
chr3_169243482_G_A	OTHER	SNP
chr3_169576337_C_G	OTHER	SNP
chr4_94504846_C_T	OTHER	SNP
chr4_94585591_G_T	DOWNSTREAM;NON_SYNONYMOUS_CODING;UPSTREAM;UTR_3_PRIME;UTR_5_PRIME	SNP
chr5_37815558_T_A	DOWNSTREAM;UTR_3_PRIME	SNP
chr5_37834712_G_A	NON_SYNONYMOUS_CODING	SNP
chr6_51893891_A_G	OTHER	SNP
chr6_51990174_A_G	OTHER	SNP
chr6_150877643_G_A	NON_SYNONYMOUS_CODING;UTR_5_PRIME	SNP
chr6_150926146_A_C	NON_SYNONYMOUS_CODING;UTR_3_PRIME	SNP
chr9_98290655_C_T	NON_SYNONYMOUS_CODING	SNP
chr9_98436816_G_T	OTHER	SNP
dbID	type	muttype
chr10_47502205_G_A	DOWNSTREAM;NON_SYNONYMOUS_CODING	SNP
chr4_154589517_C_T	NON_SYNONYMOUS_CODING	SNP
chr4_187692382_TTCTAGGACAGAGCTCCCTTCCATAGGCAGCTAA_T	OTHER	INDEL
chr5_100498813_T_G	OTHER	SNP
chr5_146327876_T_G	OTHER	SNP
chr8_105732816_G_A	DOWNSTREAM	SNP
chrX_131279125_G_A	DOWNSTREAM;UPSTREAM	SNP
chrX_140564025_T_C	OTHER	SNP
chr11_99367008_T_C	OTHER	SNP
chr11_100193508_A_T	NON_SYNONYMOUS_CODING	SNP
chr16_6483410_C_G	UPSTREAM;UTR_5_PRIME	SNP
chr16_7422562_A_T	UPSTREAM	SNP
chr2_178580477_T_C	DOWNSTREAM;NON_SYNONYMOUS_CODING;UPSTREAM	SNP
chr2_178779357_T_A	DOWNSTREAM;NON_SYNONYMOUS_CODING	SNP
chr22_36700908_C_T	UPSTREAM	SNP
chr22_36702199_A_T	UPSTREAM	SNP
chr5_173888416_C_T	UPSTREAM;UTR_5_PRIME	SNP
chr5_173889606_G_C	UPSTREAM;UTR_5_PRIME	SNP
chr7_8528474_T_C	OTHER	SNP
chr7_8708014_A_C	OTHER	SNP
chr7_14163221_A_G	OTHER	SNP
chr7_14210095_T_C	OTHER	SNP
chr7_157540717_C_A	NON_SYNONYMOUS_CODING;SPLICE_SITE_DONOR	SNP
chr7_157860664_T_A	DOWNSTREAM	SNP
chr8_76677474_A_C	UPSTREAM	SNP
chr8_76683722_G_A	UPSTREAM	SNP
dbID	type	muttype
chr14_43199909_G_A	OTHER	SNP
chr16_34963163_T_C	OTHER	SNP
chr3_71672585_T_C	DOWNSTREAM	SNP
chr3_76352759_C_A	OTHER	SNP
chr3_80746684_T_C	OTHER	SNP
chrX_27682853_T_C	OTHER	SNP
chrX_29107435_CTT_C	OTHER	INDEL
chrX_30206689_A_G	UPSTREAM	SNP
chrX_30333178_T_C	OTHER	SNP
chrX_31261800_C_T	UPSTREAM	SNP
chrX_33628659_T_C	OTHER	SNP
chrX_40413574_G_A	OTHER	SNP
chrX_44640851_GT_G	OTHER	INDEL
chrX_48831097_G_A	DOWNSTREAM;UTR_3_PRIME	SNP
chrX_50036382_CCAAA_C	OTHER	INDEL
chrX_144275455_G_A	OTHER	SNP
chrX_146885097_A_G	OTHER	SNP
chrX_147421399_T_C	OTHER	SNP
chrX_147507797_C_T	OTHER	SNP
chrX_148444008_A_T	OTHER	SNP
chrX_148500631_AGCCGCTGCCGCCGCC_A	UPSTREAM;UTR_5_PRIME	INDEL
chrX_148711531_A_G	OTHER	SNP
chrX_148771993_T_C	OTHER	SNP
chr1_107140541_A_T	UPSTREAM	SNP
chr1_107480553_T_A	OTHER	SNP
chr10_24118522_A_C	OTHER	SNP
chr10_24209117_A_G	UPSTREAM;UTR_5_PRIME	SNP
chr20_3166991_C_T	NON_SYNONYMOUS_CODING	SNP
chr20_3173525_A_C	START_GAINED;UPSTREAM;UTR_5_PRIME	SNP
chr7_69600275_T_C	UPSTREAM	SNP
chr7_70679595_T_G	OTHER	SNP
dbID	type	muttype
chr1_90511001_T_C	OTHER	SNP
chr9_78939923_G_C	OTHER	SNP
chr10_75924631_G_A	OTHER	SNP
chr10_76430057_A_C	OTHER	SNP
chr2_22336369_T_G	DOWNSTREAM	SNP
chr2_22500632_C_T	OTHER	SNP
chr2_195793882_G_A	OTHER	SNP
chr2_195864706_G_A	STOP_GAINED	SNP
chr2_204546102_C_G	NON_SYNONYMOUS_CODING	SNP
chr2_204592116_C_T	OTHER	SNP
chr20_37940108_G_A	OTHER	SNP
chr20_37944054_C_T	NON_SYNONYMOUS_CODING;SYNONYMOUS_CODING	SNP
chr20_52973160_G_T	UTR_5_PRIME	SNP
chr20_53165646_A_G	DOWNSTREAM	SNP
dbID	type	muttype
chr1_202729916_T_TA	FRAME_SHIFT;UPSTREAM;UTR_3_PRIME	INDEL
chr11_29334409_T_C	DOWNSTREAM	SNP
chr11_59668982_C_T	UPSTREAM;UTR_5_PRIME	SNP
chr6_146029186_T_C	UPSTREAM;UTR_5_PRIME	SNP
chr7_26200142_C_T	UPSTREAM	SNP
chr7_26200162_G_T	UPSTREAM	SNP
chrX_14256367_A_T	OTHER	SNP
chrX_15526062_C_T	NON_SYNONYMOUS_CODING	SNP
chrX_17592380_A_C	OTHER	SNP
chrX_78273379_A_G	NON_SYNONYMOUS_CODING	SNP
chrX_97590539_C_T	OTHER	SNP
chrX_129981063_G_A	UPSTREAM	SNP
chrX_137571259_A_G	DOWNSTREAM;UPSTREAM;UTR_3_PRIME	SNP
chrX_138631832_T_C	DOWNSTREAM;UTR_3_PRIME	SNP
chrX_154490593_C_T	SPLICE_SITE_DONOR;START_GAINED;UPSTREAM;UTR_5_PRIME	SNP
chr1_18721292_G_A	OTHER	SNP
chr1_18735669_C_T	NON_SYNONYMOUS_CODING	SNP
chr1_119915499_A_T	NON_SYNONYMOUS_CODING	SNP
chr1_119941770_A_G	UPSTREAM	SNP
chr10_68110253_T_TTC	OTHER	INDEL
chr10_68188957_G_A	NON_SYNONYMOUS_CODING	SNP
chr10_70120545_T_C	NON_SYNONYMOUS_CODING;UPSTREAM	SNP
chr10_70124080_C_A	NON_SYNONYMOUS_CODING	SNP
chr11_31102205_T_C	DOWNSTREAM;NON_SYNONYMOUS_CODING;UTR_3_PRIME	SNP
chr11_31118517_T_C	OTHER	SNP
chr16_9764196_CTTGTCTCTAGGGGAGCTTGATTTGG_C	DOWNSTREAM;FRAME_SHIFT	INDEL
chr16_9943361_G_C	UPSTREAM	SNP
chr16_61654012_G_A	DOWNSTREAM;NON_SYNONYMOUS_CODING;UTR_3_PRIME	SNP
chr16_61930523_A_G	OTHER	SNP
chr18_28001012_G_A	DOWNSTREAM	SNP
chr18_28012467_T_C	OTHER	SNP
chr2_36407602_C_G	OTHER	SNP
chr2_36430421_A_G	OTHER	SNP
chr6_128903407_A_G	OTHER	SNP
chr6_129250127_G_A	NON_SYNONYMOUS_CODING	SNP
chr7_36922463_C_T	UPSTREAM	SNP
chr7_37303776_G_A	OTHER	SNP
chr7_39131393_A_G	OTHER	SNP
chr7_39236532_C_T	OTHER	SNP
dbID	type	muttype
chr17_1485800_C_CCCGCCCCCCGCACCGCCCCCCGCA	UPSTREAM	INDEL
chr19_3964950_G_GTGCCCTTCTGCCGGCACTTC	FRAME_SHIFT;UPSTREAM	INDEL
chr6_137792580_C_T	OTHER	SNP
chr9_10041414_A_C	OTHER	SNP
chr1_10495299_A_T	NON_SYNONYMOUS_CODING	SNP
chr1_10534042_T_C	UPSTREAM	SNP
chr12_93826253_A_C	UPSTREAM	SNP
chr12_93893161_A_G	DOWNSTREAM	SNP
chr12_112506011_C_G	DOWNSTREAM;UTR_3_PRIME	SNP
chr12_112509655_AGT_A	DOWNSTREAM;UTR_3_PRIME	INDEL
chr15_60493875_G_T	DOWNSTREAM;UTR_3_PRIME	SNP
chr15_60579897_A_G	OTHER	SNP
chr16_20543156_T_A	DOWNSTREAM;NON_SYNONYMOUS_CODING;SPLICE_SITE_REGION;UPSTREAM	SNP
chr16_20555390_C_G	DOWNSTREAM;NON_SYNONYMOUS_CODING;UPSTREAM	SNP
chr19_54633054_G_T	DOWNSTREAM;NON_SYNONYMOUS_CODING;UPSTREAM	SNP
chr19_54636763_C_T	DOWNSTREAM;NON_SYNONYMOUS_CODING;UTR_3_PRIME	SNP
dbID	type	muttype
chr1_37808179_A_C	DOWNSTREAM;START_LOST;UTR_5_PRIME	SNP
chr1_54488369_G_T	OTHER	SNP
chr13_45267269_C_G	DOWNSTREAM;NON_SYNONYMOUS_CODING	SNP
chr3_110323618_T_A	OTHER	SNP
chr5_88095459_G_A	OTHER	SNP
chr9_85200255_A_G	OTHER	SNP
chr11_72024313_C_T	DOWNSTREAM;NON_SYNONYMOUS_CODING;SYNONYMOUS_CODING	SNP
chr11_72040883_A_C	UPSTREAM	SNP
chr17_80195265_G_GC	DOWNSTREAM;FRAME_SHIFT	INDEL
chr17_80204308_G_A	DOWNSTREAM;NON_SYNONYMOUS_CODING;UTR_3_PRIME	SNP
chr6_123821354_A_G	UPSTREAM	SNP
chr6_124488374_T_C	OTHER	SNP
chr7_126446068_T_C	SPLICE_SITE_REGION	SNP
chr7_127104465_G_A	OTHER	SNP
chr8_124547108_C_T	DOWNSTREAM;STOP_GAINED;UPSTREAM	SNP
chr8_124647440_T_C	OTHER	SNP

## Sheet: README
Candidate deleterious variants for the proband and sibling populations of the 15 cohort proband-sibling pairwise analysis. The ordering of the black-bar rows delineate the corresponding family between the two files.
