# Supplementary material for: A complete pedigree-based graph workflow for rare candidate variant analysis
Source: HighWire-hosted journal article supplement (doi:10.1101/gr.276387.121), 2022-04-28
Supplement: Supplemental_Methods.docx [file Supplemental_Methods.docx]

Supplementary Methods for

A complete pedigree-based graph workflow for rare candidate variant analysis

**Charles Markello, Charles Huang, Alex Rodriguez, Andrew Carroll, Pi-Chuan Chang, Jordan Eizenga, Thomas Markello, David Haussler, Benedict Paten**

Correspondence to: [cmarkell@ucsc.edu,](mailto:cmarkell@ucsc.edu) [bpaten@ucsc.edu](mailto:bpaten@ucsc.edu)

# This PDF file includes:

[Methods](#_bookmark0) 2

[S1 Read Simulation](#_bookmark1) 2

[S2 Graph Construction](#_bookmark2) 2

[S3 Read Mapping](#_bookmark3) 3

[S4 Variant Calling and Evaluation](#_bookmark4) 3

[S4.1 Variant Callers](#_bookmark5) 3

[S4.2 DeepTrio and DeepVariant Training](#_bookmark6) 4

[S5 Candidate Analysis Workflow Modules](#_bookmark7) 4

[S6 Code availability](#_bookmark8) 5

# Methods

S1 Read Simulation

To simulate reads using the vg framework we generated pangenome graphs representing the haplotypes of HG002. To build these graphs we used a reference genome (hs38d1) and a variant population dataset (GIAB HG002 version 4.2.1 high-confidence variant sets), using the vg construct command to build the pangenome graph. Since the hs38d1 reference genome is also contained in the graph whose mapping to which we were evaluating we used the reference location of in hs38d1 to evaluate if a read was correctly mapped.

First a sample graph was constructed using the vg container

<https://quay.io/vgteam/vg:ci-2890-655a9622c3d60e87f14b88d943fbd8554214a97>,

on the Genome-in-a-Bottle(GIAB) HG002 sample trio-phased variant data from <https://ftp-trace.ncbi.nlm.nih.gov/giab/ftp/release/AshkenazimTrio/HG002_NA24385_son/NISTv4.2.1/GRCh38/SupplementaryFiles/HG002_GRCh38_1_22_v4.2.1_benchmark_phased_MHCassembly_StrandSeqANDTrio.vcf.gz>, and the linear reference sequence GCA_000001405.15_GRCh38_no_alt_plus_hs38d1_analysis_set

.compact_decoys.fna.gz from <https://storage.googleapis.com/%20cmarkell-vg-wdl-dev/grch38_inputs/GCA_000001405.15_GRCh38_no_alt_plus_%20hs38d1_analysis_set.compact_decoys.fna.gz>.

Next, reads were simulated using the commands from the following script <https://github.com/cmarkello/vg-pedigree-paper/blob/main/scripts/wgs_mapping_simulation/sim_reads.sh>.

The simulated reads were mapped using BWA-MEM-hs38d1 against the linear reference, VG Giraffe against Primary, 1000GP and the Parental graph reference as produced by the VG Pedigree workflow using commands from the script

<https://github.com/cmarkello/vg-pedigree-paper/blob/main/scripts/wgs_mapping_simulation/run_mapevals.sh>. Mappings made by BWA-MEM-hs38d1 against the linear reference were injected to graph space using the same sample graph of HG002 and hs38d1 that was used to simulate reads.

Finally, the aligned reads were evaluated for mapping accuracy using the following commands from the script

<https://github.com/cmarkello/vg-pedigree-paper/blob/main/scripts/wgs_mapping_simulation/run_mapevals.sh> followed by the rendering of receiver-operator-curves of the mapping results with the commands from the script

<https://github.com/cmarkello/vg-pedigree-paper/blob/main/scripts/wgs_mapping_simulation/plot_roc_simulated_mapped_reads.sh>. Graph Alignment Map (GAM) file stats were computed using “vg stats” from VG version v1.31.0. Percent identity between aligned reads and the reference sequence were calculated using “vg gamcompare” from VG version v1.31.0.

S2 Graph Construction

All genome graphs including the 1000GP 1000 Genomes Project population graph reference and the Primary linear graph reference were constructed using VG version v1.27.0. A custom form of the GRCh38 canonical FASTA sequence was generated where all decoy contigs were merged

together into a single decoy contig in order to reduce the contig number of the file and is available at <https://storage.googleapis.com/cmarkell-vg-wdl-dev/grch38_inputs/GCA_000001405.15_GRCh38_no_alt_plus_hs38d1_analysis_set.compact_decoys.fna.gz>. This FASTA file was used as the reference framework for these graph references.

All methods of graph construction can be reproduced using the following scripts from the script repository URL <https://github.com/cmarkello/vg-pedigree-paper/tree/main/scripts/graph_construction>.

S3 Read Mapping

Real reads obtained from the GIAB sample trios HG002 and HG005 were mapped using 4 mappers: Illumina’s Dragen-hs38d1 version 3.7.5, BWA-MEM-hs38d1 version 0.7.17-r1188, Giraffe from VG version v1.31.0, and the VG Pedigree mapping workflow using VG version v1.31.0.

The commands for running Illumina’s Dragen-hs38d1 module are described in the script from the following URL: <https://github.com/cmarkello/vg-pedigree-paper/blob/main/scripts/wgs_mapping_experiments/Dragen-hs38d1_map.sh>.

The commands for running BWA-MEM-hs38d1 are described in the script from the URL: <https://github.com/cmarkello/vg-pedigree-paper/blob/main/scripts/wgs_mapping_experiments/bwamem_map.sh>.

The commands for running VG Giraffe are described in the script from the URL: <https://github.com/cmarkello/vg-pedigree-paper/blob/main/scripts/wgs_mapping_experiments/giraffe_map.sh>.

The commands for running the VG Pedigree workflow are described in the script from the URL: <https://github.com/cmarkello/vg-pedigree-paper/blob/main/scripts/wgs_mapping_experiments/giraffe_pedigree_map.sh>.

S4 Variant Calling and Evaluation S4.1 Variant Callers

We used two different variant callers for the purposes of evaluating robustness in mapping performance.

Google’s DeepTrio version 1.1.0 was used as the main variant caller of choice and Illumina’s Dragen- hs38d1 module version 3.7.5 was used as the variant caller for alternative method comparison.

All mapped HG002 and HG005 trio samples from each of the mappers from Section S3 were called using both variant callers. For DeepTrio calling, the default model that comes with version 1.1.0 was used to call genotypes over the whole genome for each sample. For DeepTrio calling using the models that were trained using the VG Giraffe-based alignments were run on chromosome 20 since that contig was held-out during the training process described in S4.2.

Called variants were subsequently evaluated by running Illumina’s Hap.py version 0.3.12 from the container jmcdani20/hap.py:v0.3.12 and RealTimeGenomics’ vcfeval version 3.12.1 using the GIAB version 4.2.1 truth-sets for the HG002 and HG005 samples.

Commands for running all variant calling and evaluations can be found in the scripts located in the following URL: <https://github.com/cmarkello/vg-pedigree-paper/tree/main/scripts/wgs_calling_experiments>.

S4.2 DeepTrio and DeepVariant Training

To enable DeepTrio to make maximal use of the pedigree graph, DeepTrio was re-trained on samples mapped against the pangenome graph. Re-training used two trios, HG002-HG003-HG004 and HG005- HG006-HG007. Each sample was mapped at 35x coverage. To improve generalization across sequencing depth, training examples were generated using random downsampling of examples by 1.0, 0.8, 0.7, 0.6, and 0.5 (corresponding to average sequence depth of 35x, 28x, 24.5x, 21x, and 17.5x). Training used examples from chr1-chr19, with chr21 and chr22 used as a tune set to select a model, and chr20 fully withheld as an independent evaluation dataset. Training used the default parameters for DeepTrio, with the exception of minimum mapping quality being set to 1, which enables DeepTrio to better take advantage of the pangenome graph’s improvement in difficult to map regions. One model was trained to call variants in the child, and another model was separately trained to call variants in the parent. DeepTrio uses each of these models during runtime to call variants for both parents and child.

Two sets of DeepTrio trained models were used in evaluation. The model trained using samples HG002-HG003-HG004 and HG005-HG006-HG007 was applied to the whole genome evaluations of the HG001 sample. The model trained using samples HG002-HG003-HG004, HG005-HG006-HG007 and HG001-NA12891-NA12892 was applied to the chromosome 20 evaluations of the HG002 and HG005 samples.

A re-trained DeepVariant model was used in evaluating HG001 whole genome results. This model was trained using just the HG002 and HG004 sample alignments against the pangenome graph. The training examples were generated using random downsampling of examples by 1.0, 0.8, 0.7, and 0.6 (corresponding to average sequence depth of 35x, 28x, 24.5x, and 21x). All other training methods and parameters were similar to those used in training the DeepTrio models.

S5 Candidate Analysis Workflow Modules

The first steps of the analysis workflow find false negative variant genotypes in the parents relative to the child such that they appear de-novo in the proband. It performs an intense pedigree-aware Bayesian re-genotyping to recover many apparent de-novo states back into simple dominant mendelian inheritance from a parent (Supplementary Fig. S8A-B). A full description of this method and heuristic derivation can be found in supplementary manuals 1 and 2 of the Gu et al. paper (Gu et al. [2019).](#_bookmark9)

The next module identifies and filters variants for various modes of Mendelian inheritance, popula- tion frequencies, and predictions of deleteriousness (Supplementary Fig. S8C). Mendelian models in- clude homozygous recessive (HR), de-novo (DN), mendelian-inconsistent regions that focus primarily on the proband’s homozygous variant or hemizygous genotypes (MI), X-linked (XL), mitochondrial, and compound-heterozygous genotypes (CM). CM genotypes are examined in regions of defined gene loci using compound Phred-scaled CADD scores known as Virtual Mendelian Model (VMM) for each combi- nation of heterozygous pairs of the CH (Gu et al. [2019).](#_bookmark9) A full description of this method and heuristic derivation can be found in supplementary manuals 3 of the Gu et al. paper (Gu et al. [2019).](#_bookmark9)

After identifying Mendelian model candidacy, a population-based and deleterious-based filter is ap- plied that is based on CADD, VMM and an assortment of population databases (Supplementary Fig. S8D). The databases used for this task include 1000Genomes (The 1000 Genomes Project Consortium [2015),](#_bookmark12) UK10K (Walter et al. [2015),](#_bookmark13) ExAC (Lek et al. [2016),](#_bookmark11) GnomAD (Karczewski et al. [2020),](#_bookmark10) and the UDP’s set of internal samples. A full description of this method and heuristic derivation can be found in supplementary manual 5 of the Gu et al. paper (Gu et al. [2019).](#_bookmark9)

For the remaining variants, their loci are further examined through a BAM file curation procedure (Supplementary Fig. S8E). Variants at these loci are filtered based on density of mismatches and consis- tency of pileups across sequence reads that are aligned in this region. A full description of this method and

heuristic derivation can be found in supplementary manual 4 of the Gu et al. paper (Gu et al. [2019).](#_bookmark9)

The last module investigates potentially false positive de-novo variants due to the density of mis- matches in a region surrounding the variant in the alignment data and filters them out (Supplementary Fig. S8F). The full description of this method and heuristic derivation can be found in supplementary manual 6 of the Gu et al. paper (Gu et al. [2019).](#_bookmark9)

In parallel to the filtering modules described above, two additional types of variants are examined for candidacy. The first of which looks for variants that have no coverage in the proband but evidence for coverage is present in everyone else in every population dataset. These variants are referred to as called-no-coverage (CNC). A module in the analysis pipeline examines these variants and checks for their presence in other population databases (Supplementary Fig. S8G). This method supplements the probands set of read coverage information with the read coverage information collected by the UDP lab to enhance the detection of large double deletions on the scale of exons. This module is described further in manual 7 of the Gu et al. paper (Gu et al. [2019).](#_bookmark9)

S6 Code availability

The scripts available for running the graph reference construction, mapping simulation and variant calling experiments is provided at <https://github.com/cmarkello/vg-pedigree-paper/scripts> [scripts](https://github.com/cmarkello/vg-pedigree-paper/scripts). The repository can be downloaded directory using

git clone <https://github.com/cmarkello/vg-pedigree-paper.git>

The main VG Pedigree workflow is available both in TOIL format from the pedigree sub- command of the “toil-vg” program as available from <https://github.com/vgteam/toil-vg.git>. The workflow is also available in WDL format and is available on Dockstore at the following URL: <https://dockstore.org/workflows/github.com/vgteam/vg_wdl/vg-pedigree-giraffe-deeptrio:master>. The candidate analysis workflow has been made available as a separate program for interoperability purposes and is available in TOIL format from the analysis sub-command of the toil-vg program as available from <https://github.com/vgteam/toil-vg.git>. The workflow is also written in WDL format and is available on Dockstore at the following URL: <https://dockstore.org/workflows/github.com/cmarkello/bmtb_wdl/bmtb:main>.

# References

Gu F, Wu A, Gordon MG, Vlahos L, Macnamara S, Burke E, Malicdan MC, Adams DR, Tifft CJ, Toro C, et al. 2019. A suite of automated sequence analyses reduces the number of candidate deleterious variants and reveals a difference between probands and unaffected siblings. *Genetics in Medicine*. **21**: 1772–1780.

Karczewski KJ, Francioli LC, Tiao G, Cummings BB, Alföldi J, Wang Q, Collins RL, Laricchia KM, Ganna A, Birnbaum DP, et al. 2020. The mutational constraint spectrum quantified from variation in 141,456 humans. *Nature*. **581**: 434–443.

Lek M, Karczewski KJ, Minikel EV, Samocha KE, Banks E, Fennell T, ODonnell-Luria AH, Ware JS, Hill AJ, Cummings BB, et al. 2016. Analysis of protein-coding genetic variation in 60,706 humans. *Nature*. **536**: 285–291.

The 1000 Genomes Project Consortium. 2015. A global reference for human genetic variation. *Nature*.

**526**: 68–74.

Walter K, Min JL, Huang J, Crooks L, Memari Y, McCarthy S, Perry JRB, Xu C, Futema M, Lawson D, et al. 2015. The UK10K project identifies rare variants in health and disease. *Nature*. **526**: 82–90.
